# Supplementary material for: Encapsulation of Polyphenols from Lycium barbarum Leaves into Liposomes as a Strategy to Improve Their Delivery
Source: MDPI journal article supplement (doi:10.3390/nano11081938), 2021-07-28
Supplement: s1 [file s1]

# Supplementary Materials: Encapsulation of Polyphenols from *Lycium Barbarum* Leaves into Liposomes as a Strategy to Improve Their Delivery

Ramona-Daniela Păvăloiu <sup>1,2,\*</sup>, Fawzia Sha'at <sup>1,2</sup>, Georgeta Neagu <sup>1</sup>, Mihaela Deaconu <sup>2</sup>, Corina Bubueanu <sup>1</sup>, Adrian Albulescu <sup>1,3</sup>, Mousa Sha'at <sup>4</sup>, and Cristina Hlevca <sup>1</sup>

- <sup>1</sup> National Institute for Chemical-Pharmaceutical Research & Development—ICCF Bucharest, Vitan Av. nr. 112, 3rd district, 031299, Bucharest, Romania; fawzya.shaata@gmail.com (F.S.); georgetaneagu2008@gmail.com (G.N.); cbubueanu@gmail.com (C.B.); rockady2@gmail.com (A.A.); crhlevca@gmail.com (C.H.)
- <sup>2</sup> Department of Inorganic Chemistry, Physical-Chemistry & Electrochemistry, Faculty of Applied Chemistry and Materials Science, University "Politehnica" of Bucharest, Gheorghe Polizu Street nr. 1–7, 1st district, 011061 Bucharest, Romania; mihaelladeaconu@gmail.com
- <sup>3</sup> Department of Molecular Virology, Stefan S. Nicolau Institute of Virology, Mihai Bravu Av. nr. 285, 3rd district, 030304 Bucharest, Romania
- <sup>4</sup> Department of Pharmaceutical Technology, Faculty of Pharmacy, University of Medicine and Pharmacy Grigore T. Popa, Universitatii Street. nr. 16, 700115 Iasi, Romania; mousa.shaata1@gmail.com
- \* Correspondence: pavaloiu.daniella@gmail.com; Tel.: +40-0728-397-515

## 1. Characterization of *L. barbarum* extract

Table S1. Parameters of standard phenolic compounds

| Compound               | RT ± SD, min | $\lambda_{max}$ , nm | Calibration curve   | R <sup>2</sup> |
|------------------------|--------------|----------------------|---------------------|----------------|
| Gallic acid            | 3.82 ± 0.10  | 271                  | y=8371.14*x-1207.10 | 0.9993         |
| Protocatechuic acid    | 7.32 ± 0.09  | 360                  | y=9007.30*x-1186.03 | 0.9997         |
| Caftaric acid          | 11.09 ± 0.04 | 329                  | y=3741.63*x-1004.52 | 0.9992         |
| Catechin hydrate       | 12.79 ± 0.27 | 279                  | y=1704.55*x-1484.97 | 0.9974         |
| Chlorogenic acid       | 13.54 ± 0.26 | 326                  | y=7634.01*x-1686.39 | 0.9984         |
| Vanillic acid          | 15.27 ± 0.03 | 261                  | y=8457.44*x-1216.69 | 0.9999         |
| Caffeic acid           | 15.53 ± 0.22 | 323                  | y=13188.1*x-1501.42 | 0.9989         |
| Syringic acid          | 16.89 ± 0.03 | 275                  | y=6929.03*x-667.27  | 0.9997         |
| (-)-Epicatechin        | 17.82 ± 0.04 | 278                  | y=1585.49*x-273.15  | 0.9998         |
| p-Coumaric acid        | 22.29 ± 0.24 | 309                  | y=18220.6*x-1642.10 | 0.9946         |
| trans-Ferulic acid     | 25.51 ± 0.05 | 323                  | y=3135.95*x-769.69  | 0.9999         |
| Ellagic acid dihydrate | 25.62 ± 0.06 | 252                  | y=5128.27*x-577.18  | 0.9996         |
| Rutin hydrate          | 26.50 ± 0.02 | 355                  | y=3813.02*x-838.90  | 0.9985         |
| Chicoric acid          | 29.37 ± 0.05 | 330                  | y=10560.6*x-1939.03 | 0.9975         |
| Myricetin              | 31.95 ± 0.13 | 373                  | y=9150.32*x-1464.36 | 0.9991         |
| Rosmarinic acid        | 31.73 ± 0.10 | 330                  | y=7282.31*x-633.29  | 0.9988         |
| trans-Resveratrol      | 33.43 ± 0.11 | 307                  | y=17601.1*x-2585.25 | 0.9989         |
| Quercetin              | 34.91 ± 0.05 | 371                  | y=9898.83*x-723.17  | 0.9994         |
| Kaempferol             | 35.94 ± 0.03 | 367                  | y=10549.7*x-1296.00 | 0.9981         |

## 2. Characterization of liposomes loaded with *L. barbarum*

### 2.1. HPLC analysis of supernatants

After the extract was encapsulated in liposomes, each supernatant was separated and analyzed through RP-HPLC to quantify the polyphenolic compounds. The results are presented in Figure S1 and Table S2.

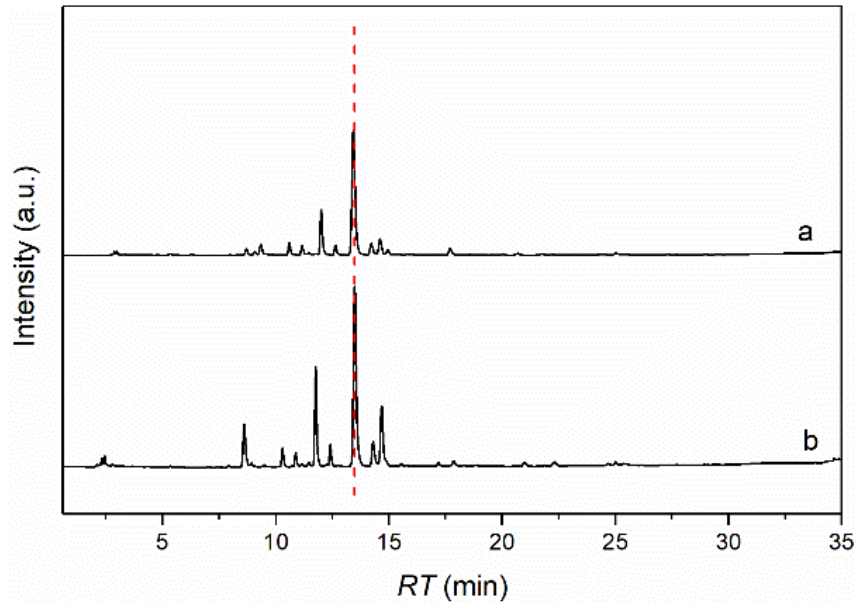

Figure S1. RP-HPLC chromatograms of LB\_L1 (a) and LB\_L2 (b) supernatants after encapsulation of *L. barbarum* extract

Table S2. Polyphenolic compounds concentration entrapped in liposomal formulations

| Polyphenolic compound | RT, min | LB_L1 supernatant concentration, mg/g extract | LB_L2 supernatant concentration, mg/g extract | LB_L1 concentration, mg/g extract | LB_L2 concentration, mg/g extract |
|-----------------------|---------|-----------------------------------------------|-----------------------------------------------|-----------------------------------|-----------------------------------|
| Gallic acid           | 3.85    | 0.060 ± 0.001                                 | 0.059 ± 0.001                                 | 0.171 ± 0.001                     | 0.172 ± 0.001                     |
| Chlorogenic acid      | 13.55   | 6.682 ± 0.001                                 | 3.252 ± 0.001                                 | 12.058 ± 0.001                    | 15.488 ± 0.001                    |
| Caffeic acid          | 15.50   | ND                                            | 0.032                                         | 1.773 ± 0.002                     | 1.741 ± 0.001                     |
| Rosmarinic acid       | 31.71   | ND                                            | ND                                            | 0.108 ± 0.001                     | 0.108 ± 0.001                     |

\* The quantity of encapsulated polyphenols was calculated by subtracting the amount of polyphenols used in initial formulation from amount of unbound polyphenols present in supernatant obtained after centrifugation of liposomes

\*\* ND - not detected
